# Supplementary material for: Genome-wide identification and characterization of the NF-Y gene family in grape (vitis vinifera L.)
Source: PubMed Central journal article supplement (PMC4982312; doi:10.1186/s12864-016-2989-3), 2016-08-11
Supplement: 12864_2016_2989_MOESM2_ESM.pdf [file 12864_2016_2989_MOESM2_ESM.pdf]

### NF-YA Subunits

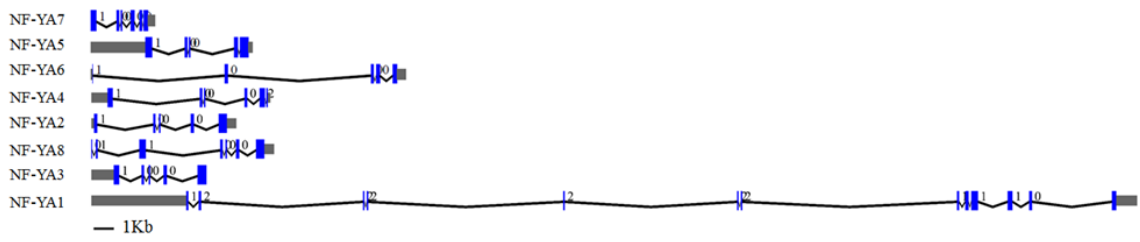

### NF-YB Subunits

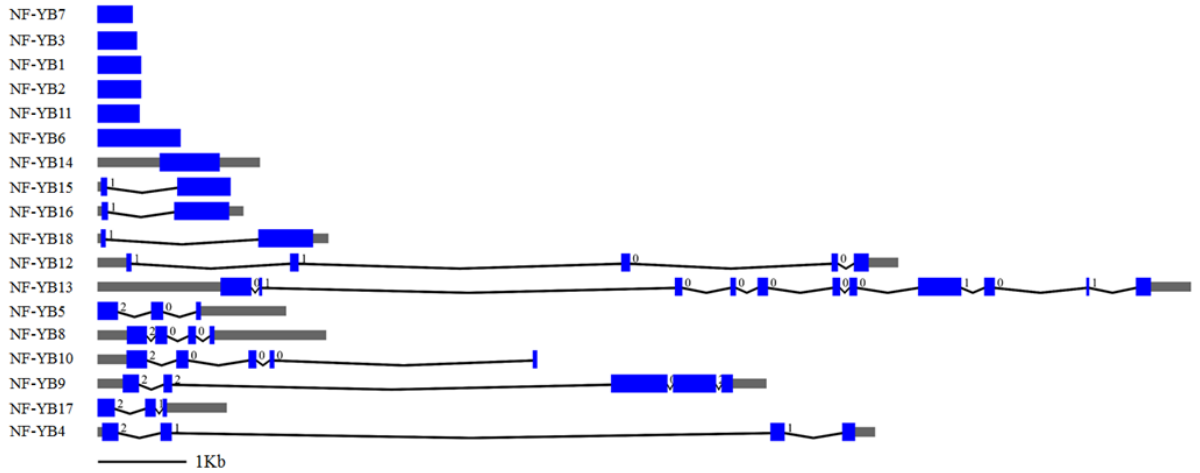

### NF-YC Subunits

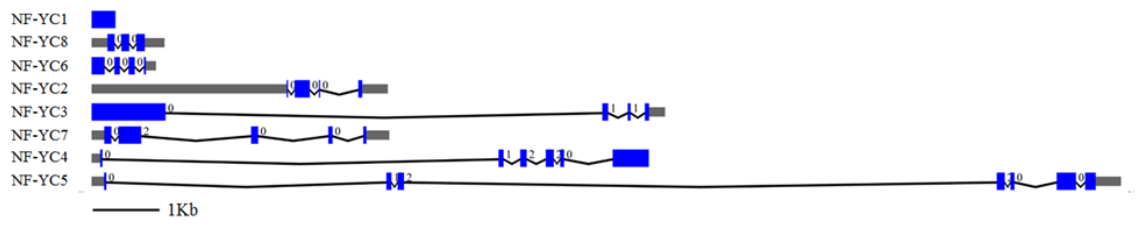

#### Legend:

CDS
  upstream/ downstream
  Intron
 0 1 2: intron phase
