# Supplementary material for: Genome-wide identification and characterization of the NF-Y gene family in grape (vitis vinifera L.)
Source: PubMed Central journal article supplement (PMC4982312; doi:10.1186/s12864-016-2989-3), 2016-08-11
Supplement: 12864_2016_2989_MOESM3_ESM.pdf [file 12864_2016_2989_MOESM3_ESM.pdf]

| Gene Name      | Probesets ID                    |                                | Identity (%) |
|----------------|---------------------------------|--------------------------------|--------------|
|                | Grape <i>Vitis vinifera</i> 16K | <i>Vitis vinifera</i> GrapeGen |              |
| <i>NF-YA2</i>  | 1618496_at                      | VVTU7693_at                    | 95.4         |
|                |                                 | VVTU32730_at                   | 100.0        |
| <i>NF-YA3</i>  | 1615298_s_at                    | VVTU15501_at                   | 100.0        |
|                |                                 | VVTU10245_at                   | 100.0        |
|                |                                 |                                | 98.7         |
|                |                                 |                                | 98.7         |
| <i>NF-YA5</i>  | 1621922_at                      | VVTU16239_at                   | 100          |
| <i>NF-YA6</i>  | 1615871_at                      | VVTU2545_at                    | 96.9         |
| <i>NF-YA7</i>  | 1620399_at                      | VVTU5429_at                    | 100          |
| <i>NF-YA8</i>  | 1621265_at                      | VVTU3152_at                    | 99.7         |
| <i>NF-YB4</i>  | 1617831_at                      | VVTU21324_at                   | 95.2         |
|                |                                 | VVTU4637_at                    | 95.2         |
| <i>NF-YB9</i>  | 1613827_s_at                    | VVTU26075_x_at                 | 98.0         |
| <i>NF-YB10</i> | 1616087_at                      | VVTU15088_s_at                 | 95.2         |
| <i>NF-YB12</i> | 1607202_s_at                    | VVTU2955_at                    | 100.0        |
| <i>NF-YB13</i> | 1611997_at                      | VVTU7943_at                    | 99.6         |
| <i>NF-YB17</i> | 1617362_at                      | VVTU9459_at                    | 98.0         |
| <i>NF-YB18</i> | 1614136_at                      | VVTU2237_at                    | 99.1         |
| <i>NF-YC2</i>  | 1616105_at                      | VVTU17073_at                   | 99.7         |
| <i>NF-YC5</i>  | 1609311_at                      | VVTU7457_s_at                  | 99.5         |
|                |                                 | VVTU25126_at                   | 100.0        |
| <i>NF-YC8</i>  | 1607559_at                      | VVTU6141_s_at                  | 99.5         |
