# Supplementary material for: Genome-wide identification and characterization of the NF-Y gene family in grape (vitis vinifera L.)
Source: PubMed Central journal article supplement (PMC4982312; doi:10.1186/s12864-016-2989-3), 2016-08-11

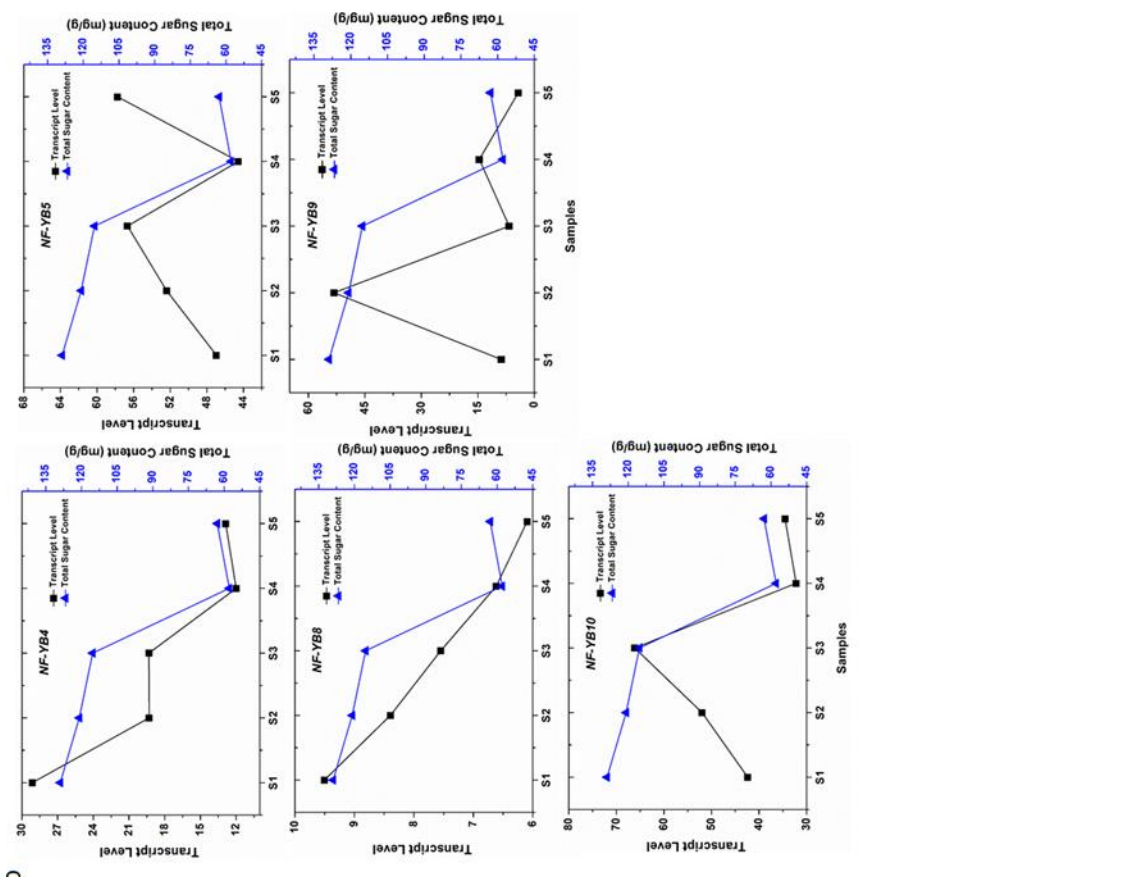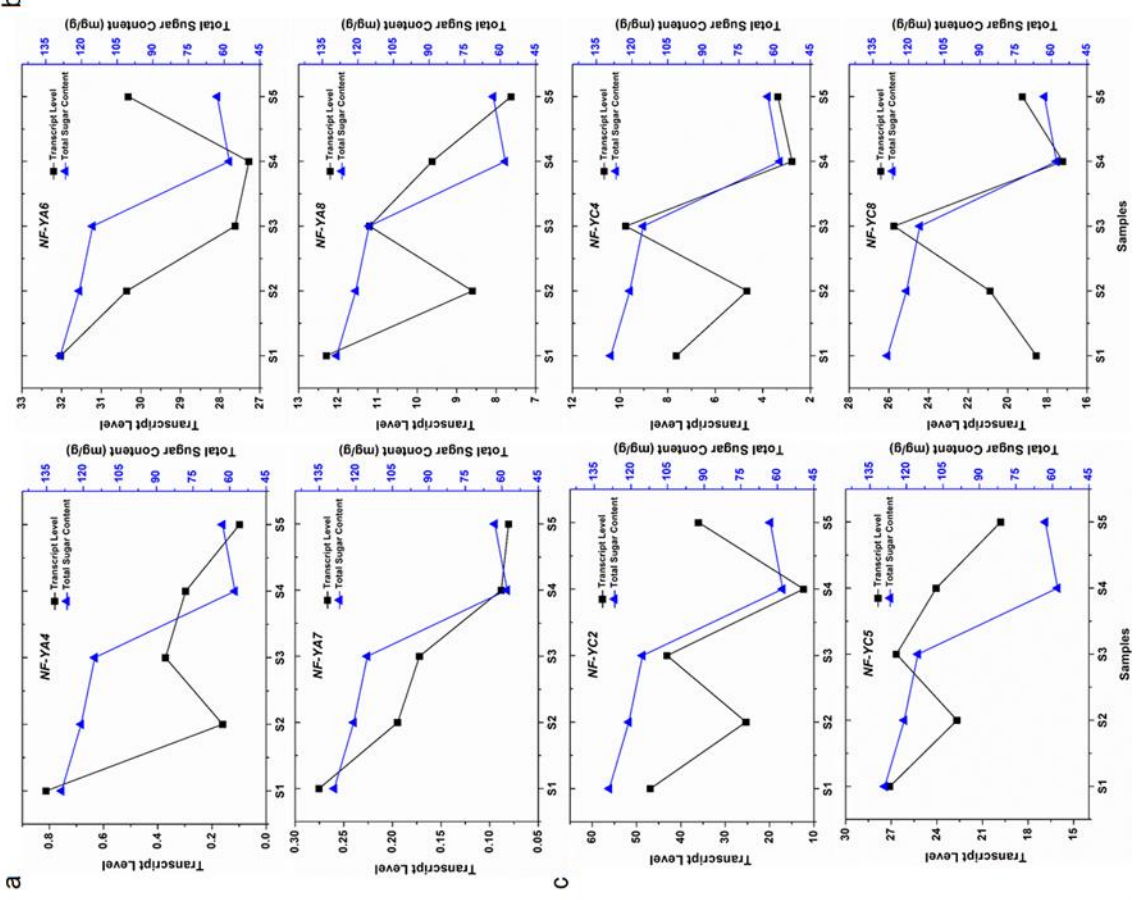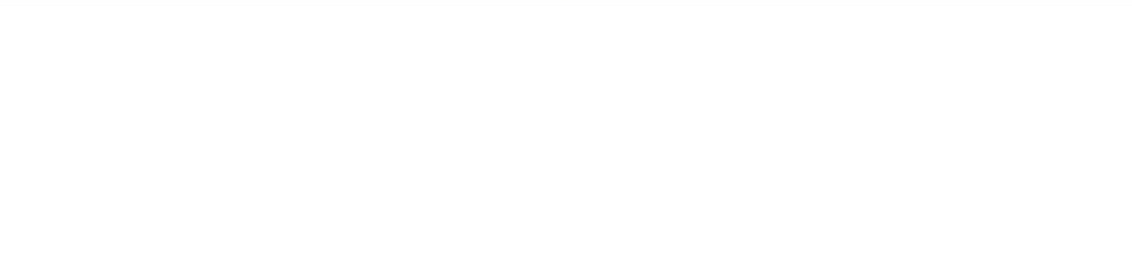

Supplement: 12864_2016_2989_MOESM4_ESM.pdf [file 12864_2016_2989_MOESM4_ESM.pdf]
