# Supplementary material for: Genome-wide identification and characterization of the NF-Y gene family in grape (vitis vinifera L.)
Source: PubMed Central journal article supplement (PMC4982312; doi:10.1186/s12864-016-2989-3), 2016-08-11
Supplement: 12864_2016_2989_MOESM5_ESM.pdf [file 12864_2016_2989_MOESM5_ESM.pdf]

| Gene name      | Primer sequence (forward/reverse)                     | Product size (bp) |
|----------------|-------------------------------------------------------|-------------------|
| <i>Actin 1</i> | CAGCAGATGTGGATCTCAA<br>CTGTGGACAATGGAAGGAC            | 59                |
| <i>UBC</i>     | GAGGGTCGTCAGGATTTGGA<br>GCCCTGCACTTACCATCTTTAAG       | 75                |
| <i>NF-YA1</i>  | TTCCACAGGGATTTTGCAGATA<br>CTCTGCTCTGCCCTCAACATAC      | 149               |
| <i>NF-YA6</i>  | CACAACTTGGGGCAGGACAT<br>GTTGTGCAGGATAGGGCTGT          | 108               |
| <i>NF-YA7</i>  | AGCCCGAAAGCCATATCTGC<br>CCAGTATCAGAACTATGACAGCCA      | 144               |
| <i>NF-YB4</i>  | GATCCTGTTGCTCTAAATGCCA<br>GGCGAGCTGCAAAACAGAAG        | 166               |
| <i>NF-YB5</i>  | TGGCATATGCAACTGAAAGAGAAGC<br>GGCATTGTCAACTTTGCTTCCAC  | 125               |
| <i>NF-YB7</i>  | AGCAGATCCTGCCACCTAATG<br>TCCCCATTGACAGTCTTGCG         | 142               |
| <i>NF-YB8</i>  | ACATCAAGGTCCTTACACGCA<br>TTTCTTGGAGCATGCAGTCA         | 92                |
| <i>NF-YB10</i> | CAGCGAGGCTAGTGATAAGTGTC<br>CCCCTGGTATCACCCCTCTCTATATC | 150               |
| <i>NF-YB14</i> | GGTCTCGTCGGCGATATTCC<br>ACGACGTAGAGTCTCGACCA          | 139               |
| <i>NF-YB15</i> | GAAAGTGAGGTGGGTTGTGC<br>CGCCAGGATTCAGAGCAGAG          | 115               |
| <i>NF-YC2</i>  | CCAGGAATGAGCAGAAGCAAGA<br>TGTGCAGCCCACATATTCCG        | 134               |
| <i>NF-YC4</i>  | AGGAAGAAGCTCGACACACG<br>ACTAGGAGAGGCACAGCCAA          | 101               |
| <i>NF-YC5</i>  | AGATGAAGATCACCAGCACCAG<br>TTCAGAAAGTGACCAGCCAGG       | 111               |
| <i>NF-YC6</i>  | GAGCAGGATTTGTTGTGGCA<br>TTCCTCGCTTGGGAGCATT           | 150               |
| <i>NF-YC8</i>  | GGTCTTGGGGCAGTTGTTGA<br>GTATCTGTTTGCTGCTGTTGGG        | 128               |
